# Supplementary material
Source: HighWire-hosted journal article supplement (https://dmd.aspetjournals.org/highwire/filestream/66691/field_highwire_adjunct_files/0/Supplemental_71183.pdf)
Supplement: Supplemental_71183.pdf [file Supplemental_71183.pdf]

## Drug Metabolism & Disposition

### Abundance of Hepatic Transporters in Caucasians: A Meta-Analysis

Howard J Burt\*, Arian Emami Riedmaier\*, Matthew D Harwood, H. Kim Crewe, Katherine L Gill, Sibylle Neuhoff

#### Supplementary Material 1. References corresponding to the data presented in Table 3.

| Transporter | References          |
|-------------|---------------------|
| BCRP        | [1-5]               |
| BSEP        | [1, 2, 5, 6]        |
| ENT1        | [2]                 |
| MATE1       | [2, 6]              |
| MCT1        | [2]                 |
| MDR1        | [2, 4-8]            |
| MRP2        | [2, 4-6, 9, 10]     |
| MRP3        | [5, 6]              |
| MRP4        | [2, 6]              |
| MRP6        | [2, 6]              |
| NTCP        | [2, 5, 6, 11]       |
| OAT2        | [2, 6]              |
| OAT7        | [6]                 |
| OATP1B1     | [2, 5, 7, 8, 12-14] |
| OATP1B3     | [2, 5, 7, 8, 12-14] |
| OATP2B1     | [2, 5, 7, 8, 12-14] |
| OCT1        | [5, 6]              |
| OCT3        | [6]                 |
| MDR3        | [2]                 |
| MRP1        | [2, 6]              |
| MRP5        | [2]                 |
| ABCA6       | [2]                 |
| ABCA8       | [2]                 |
| CNT1        | [2]                 |

1. Li, N., et al., *LC-MS/MS mediated absolute quantification and comparison of bile salt export pump and breast cancer resistance protein in livers and hepatocytes across species*. *Anal Chem*, 2009. **81**(6): p. 2251-2259.
2. Ohtsuki, S., et al., *Simultaneous absolute protein quantification of transporters, cytochromes P450, and UDP-glucuronosyltransferases as a novel approach for the characterization of individual human liver: comparison with mRNA levels and activities*. *Drug Metab Dispos*, 2012. **40**(1): p. 83-92.
3. Prasad, B., et al., *Interindividual variability in the hepatic expression of the human breast cancer resistance protein (BCRP/ABCG2): effect of age, sex, and genotype*. *J Pharm Sci*, 2013. **102**(3): p. 787-793.
4. Tucker, T.G.H.A., et al., *Absolute immunoquantification of the expression of ABC transporters P-glycoprotein, breast cancer resistance protein and multidrug resistance-associated protein 2 in human liver and duodenum*. *Biochem Pharmacol*, 2012. **83**(2): p. 279-285.
5. Wang, L., et al., *Interspecies variability in expression of hepatobiliary transporters across human, dog, monkey, and rat as determined by quantitative proteomics*. *Drug Metab Dispos*, 2015. **43**(3): p. 367-374.

6. Vildhede, A., *In vitro and in silico predictions of hepatic transporter-mediated drug clearance and drug-drug interactions in vivo*, in *Digital Comprehensive Summaries of Uppsala Dissertations from the Faculty of Pharmacy 193*. 2015, Uppsala University.
7. Peng, K.-W., et al., *Ethnic variability in the expression of hepatic drug transporters: absolute quantification by an optimized targeted quantitative proteomic approach*. *Drug Metab Dispos*, 2015. **43**(7): p. 1045-1055.
8. Prasad, B., et al., *Interindividual variability in hepatic organic anion-transporting polypeptides and P-glycoprotein (ABCB1) protein expression: quantification by liquid chromatography tandem mass spectroscopy and influence of genotype, age, and sex*. *Drug Metab Dispos*, 2014. **42**(1): p. 78-88.
9. Deo, A.K., et al., *Interindividual variability in hepatic expression of the multidrug resistance-associated protein 2 (MRP2/ABCC2): quantification by liquid chromatography/tandem mass spectrometry*. *Drug Metab and Dispos*, 2012. **40**(5): p. 852-855.
10. Li, N., et al., *Absolute difference of hepatobiliary transporter multidrug resistance-associated protein (MRP2/Mrp2) in liver tissues and isolated hepatocytes from rat, dog, monkey, and human*. *Drug Metab Dispos*, 2009. **37**(1): p. 66-73.
11. Qiu, X., et al., *Absolute measurement of species differences in sodium taurocholate cotransporting polypeptide (NTCP/Ntcp) and its modulation in cultured hepatocytes*. *J Pharm Sci*, 2013. **102**(9): p. 3252-3263.
12. Balogh, L.M., et al., *Membrane Protein Quantification by Peptide-Based Mass Spectrometry Approaches: Studies on the Organic Anion-Transporting Polypeptide Family*. *J Proteomics Bioinform*, 2012. **S4**: p. 1-8.
13. Kimoto, E., et al., *Characterization of organic anion transporting polypeptide (OATP) expression and its functional contribution to the uptake of substrates in human hepatocytes*. *Mol Pharm*, 2012. **9**(12): p. 3535-42.
14. Vildhede, A., et al., *Hepatic uptake of atorvastatin: influence of variability in transporter expression on uptake clearance and drug-drug interactions*. *Drug Metab Dispos*, 2014. **42**(7): p. 1210-1218.
